# Supplementary material for: Hg2+ recognition by triptycene-derived heteracalixarenes: selectivity tuned by bridging heteroatoms and macrocyclic cavity
Source: Royal Society of Chemistry journal article supplement (doi:10.1039/c1ob05515a), 2011-01-01
Supplement: c1ob05515a.pdf [file c1ob05515a.pdf]

## Electronic Supplementary Information

### **Hg<sup>2+</sup> recognition by triptycene-derived heterocalixarenes: selectivity tuned by bridging heteroatoms and macrocyclic cavity**

Shu-Zhen Hu and Chuan-Feng Chen\*

*Beijing National Laboratory for Molecular Sciences, CAS Key Laboratory of Molecular Recognition and Function, Institute of Chemistry, Chinese Academy of Sciences, Beijing 100190, China.*

*E-mail: cchen@iccas.ac.cn*

### Contents

|                                                                                                             |       |
|-------------------------------------------------------------------------------------------------------------|-------|
| 1. Copies of <sup>1</sup> H NMR and <sup>13</sup> C NMR spectra of <b>3</b> , <b>2a</b> and <b>2b</b> ----- | S2-S3 |
| 2. <sup>1</sup> H NMR titrations of <b>1a</b> with Zn(ClO <sub>4</sub> ) <sub>2</sub> -----                 | S4    |
| 3. <sup>1</sup> H NMR titrations of <b>2a</b> with Zn(ClO <sub>4</sub> ) <sub>2</sub> -----                 | S5    |
| 4. UV-vis spectra of <b>1b</b> , <b>2a</b> and <b>2b</b> in the presence of metal ions -----                | S6    |
| 5. Fluorescence spectra of Dmnapy in the presence of metal ions -----                                       | S7    |

1. Copies of  $^1\text{H}$  NMR and  $^{13}\text{C}$  NMR spectra of **3**, **2a** and **2b**.

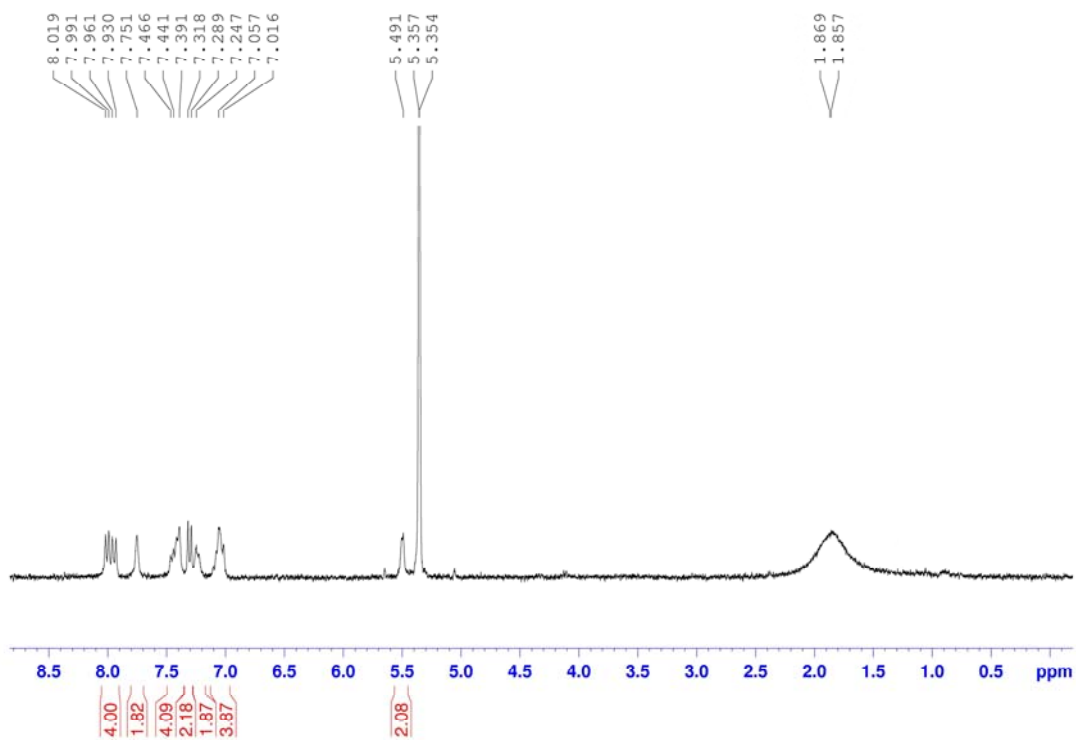

**Fig. S1.**  $^1\text{H}$  NMR spectrum (CD<sub>2</sub>Cl<sub>2</sub>, 300 MHz, 298 K) of trimer **3**.

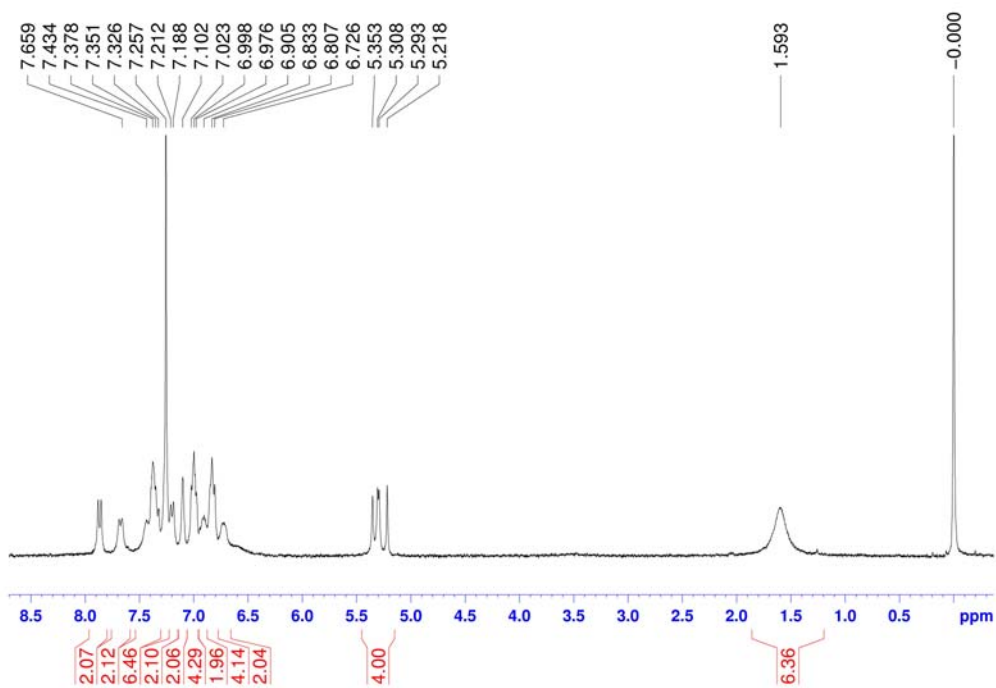

**Fig. S2.**  $^1\text{H}$  NMR spectrum (CDCl<sub>3</sub>, 300 MHz, 298 K) of **2a**.

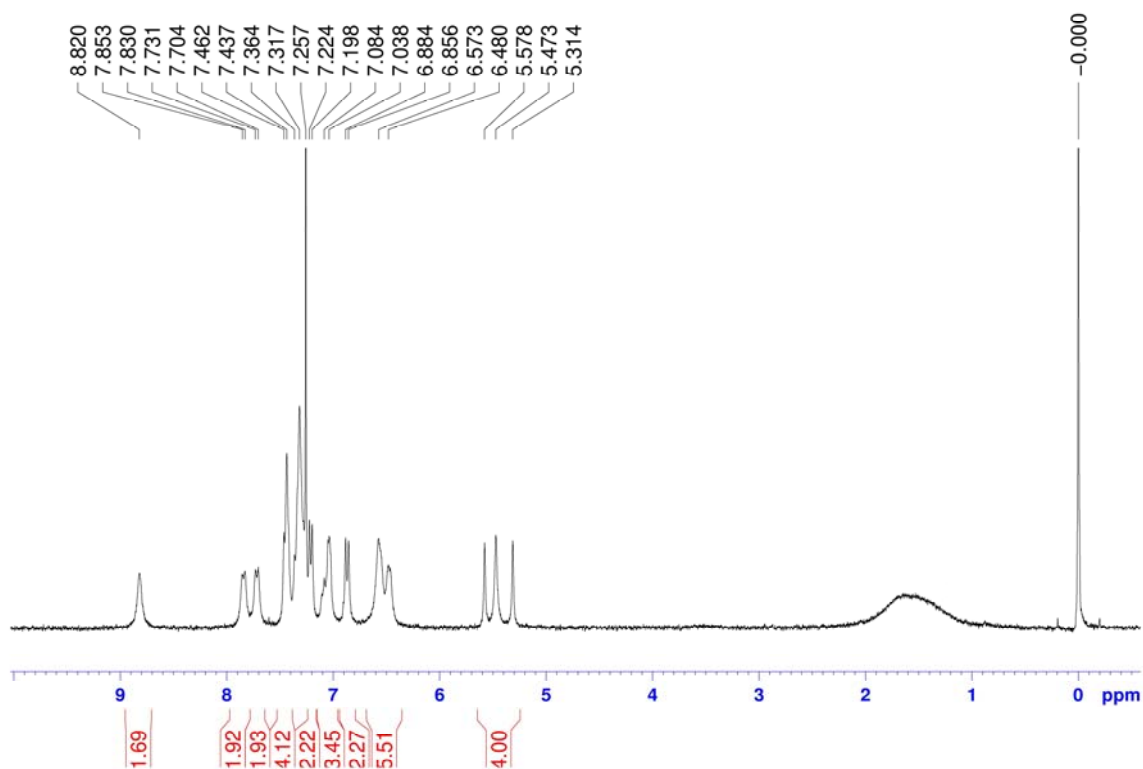

**Fig. S3.**  $^1\text{H}$  NMR spectrum ( $\text{CDCl}_3$ , 300 MHz, 298 K) of **2b**.

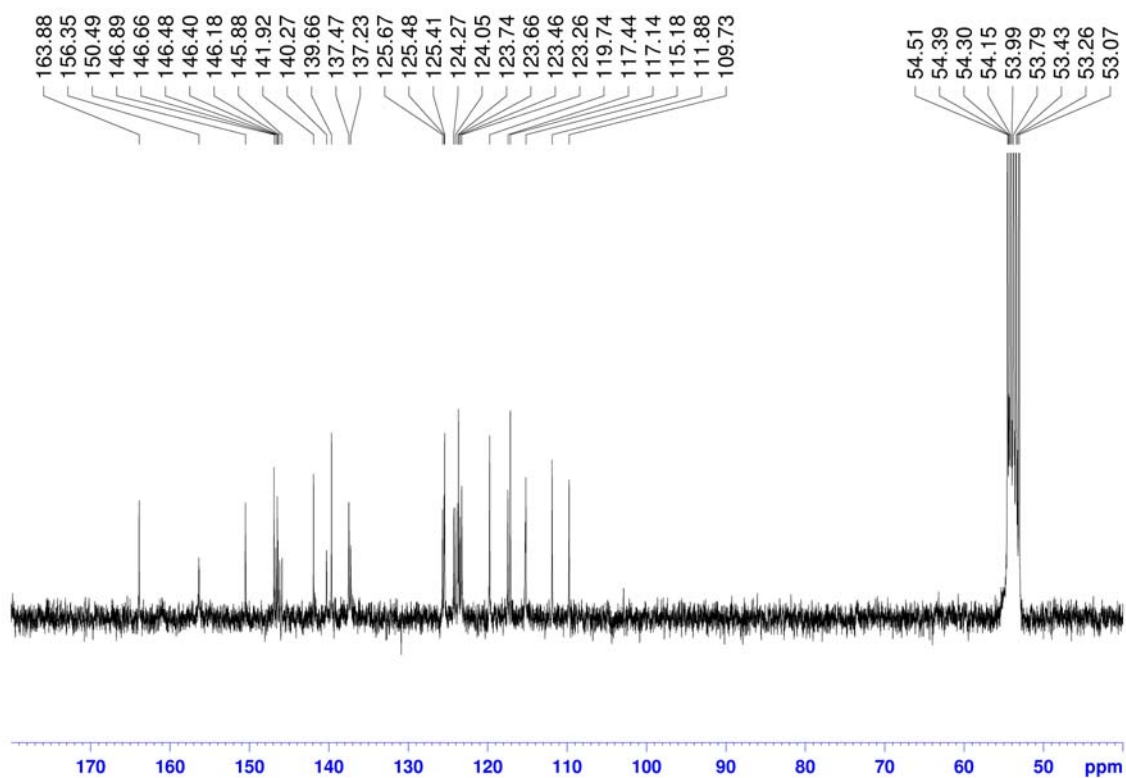

**Fig. S4.**  $^{13}\text{C}$  NMR spectrum ( $\text{CD}_2\text{Cl}_2$ , 75 MHz, 298 K) of **2b**.

## 2. $^1\text{H}$ NMR titrations of **1a** with $\text{Zn}(\text{ClO}_4)_2$

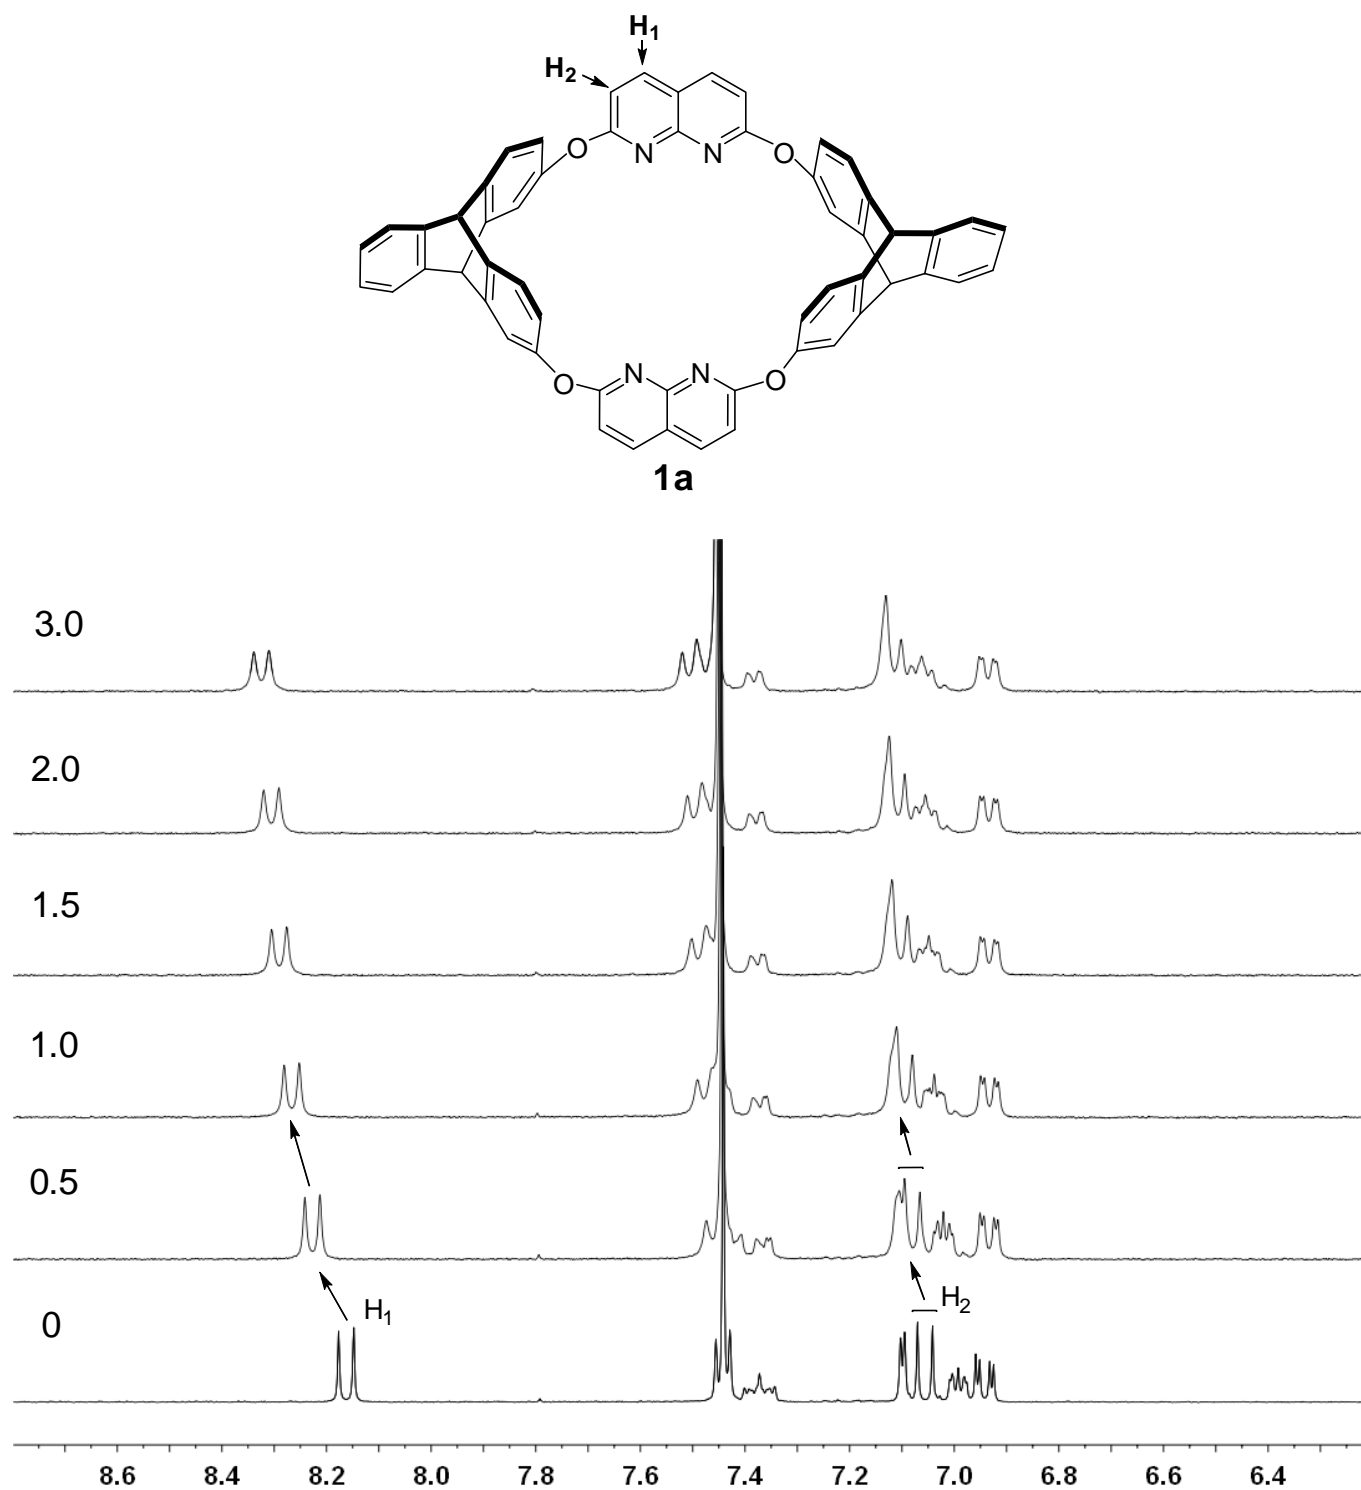

**Fig. S5**  $^1\text{H}$  NMR titrations of **1a** (2 mM in  $\text{CDCl}_3/\text{CH}_3\text{CN}$ , 2:1, v:v) with  $\text{Zn}^{2+}$  (0-3 equiv.) at 298 K.

### 3. $^1\text{H}$ NMR titrations of **2a** with $\text{Zn}(\text{ClO}_4)_2$

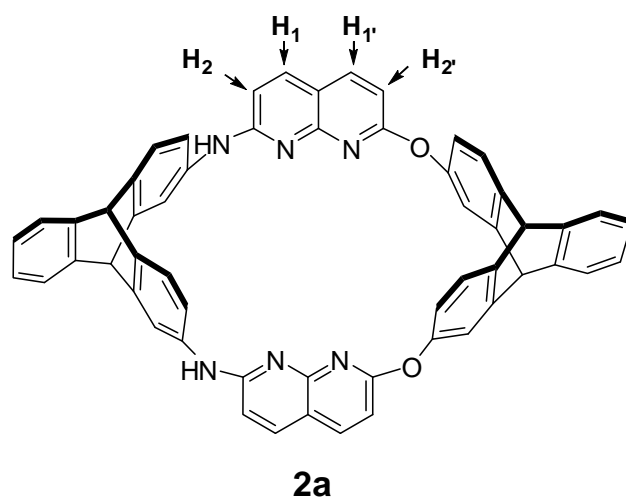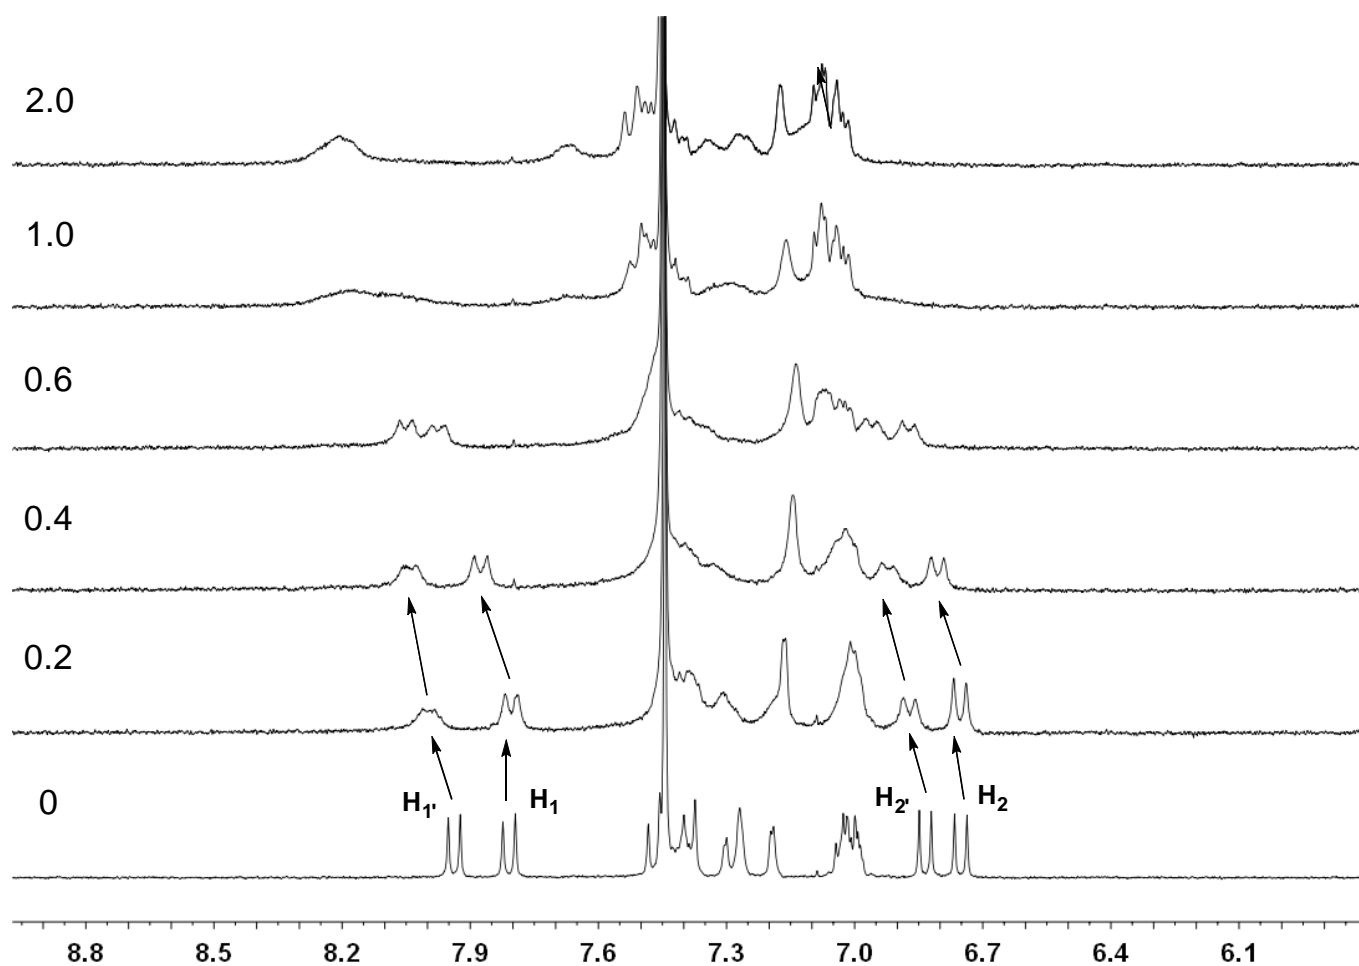

**Fig. S6**  $^1\text{H}$  NMR titrations of **2a** (2 mM in  $\text{CDCl}_3/\text{CH}_3\text{CN}$ , 2:1, v:v) with  $\text{Zn}^{2+}$  (0-3 equiv.) at 298 K.

#### 4. UV-vis spectra of **1b**, **2a** and **2b** in the presence of metal ions

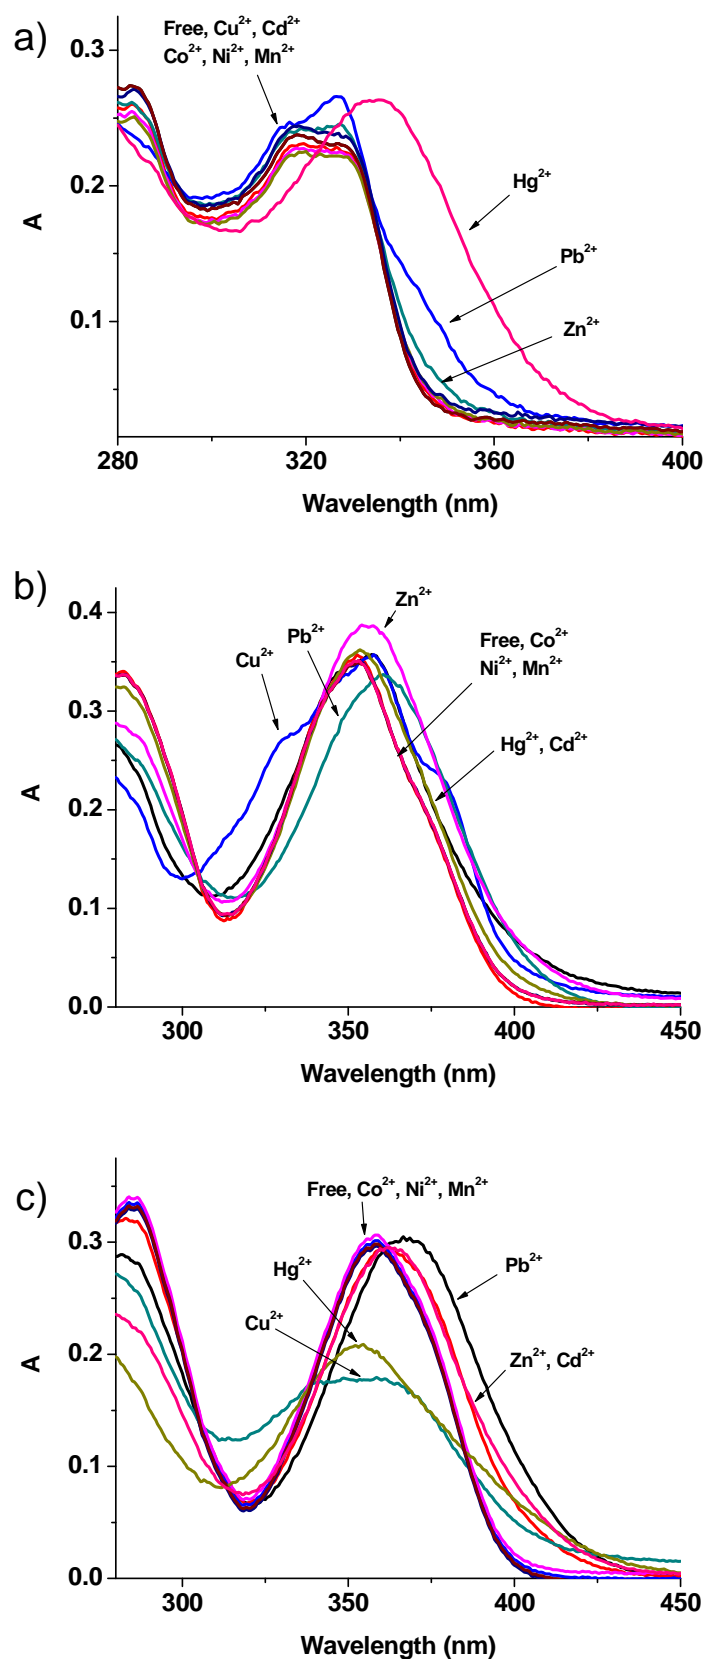

**Fig. S7** Absorption spectra of a) **1b**, b) **2a**, c) **2b** (all were  $10 \mu\text{M}$  in  $\text{CH}_3\text{CN}$ ) in the absence and presence of 5 equiv. of metal ions.

## 5. Fluorescence spectra of Dmnapy in the presence of metal ions

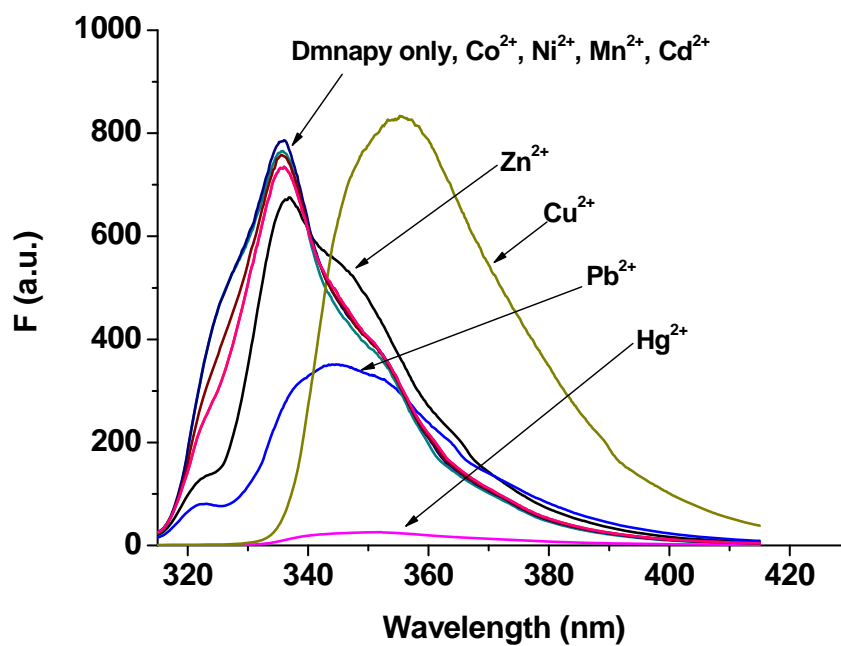

**Fig. S8** Fluorescence spectra of Dmnapy (10  $\mu$ M in CH<sub>3</sub>CN) in the absence and presence of 50 equiv. of metal ions.
